# Supplementary material for: A Simple Fluorescent Cholesterol Labeling Method to Cryoprotect and Detect Plasma Lipoprotein-X
Source: MDPI journal article supplement (doi:10.3390/biology11081248), 2022-08-22
Supplement: s1 [file s1]

# **SUPPLEMENTARY MATERIALS**

**ORIGINAL SCANS OF GELS IN FIGURES S1-S5**

# Figure S1A

**BODIPY-  
Cholesterol  
Fluorescence**

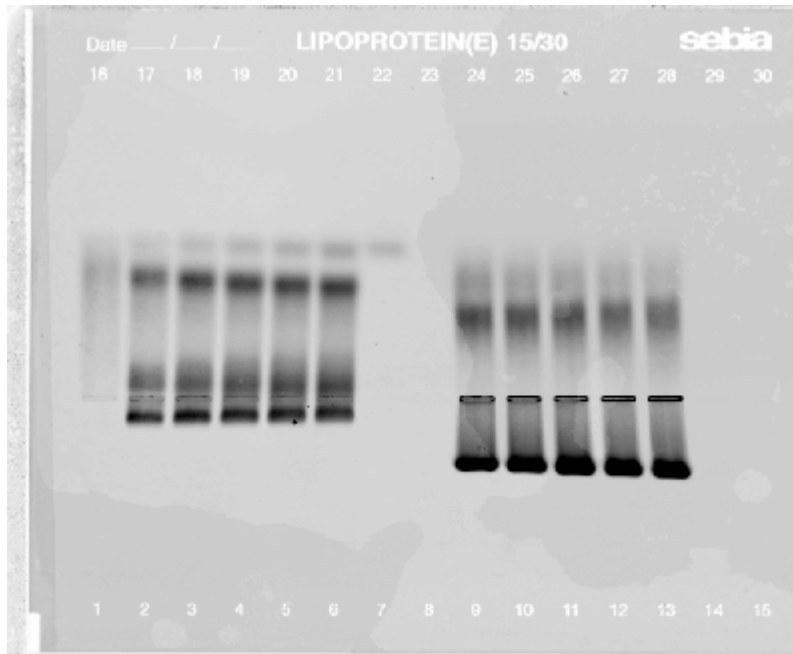

**Sudan Black Staining**

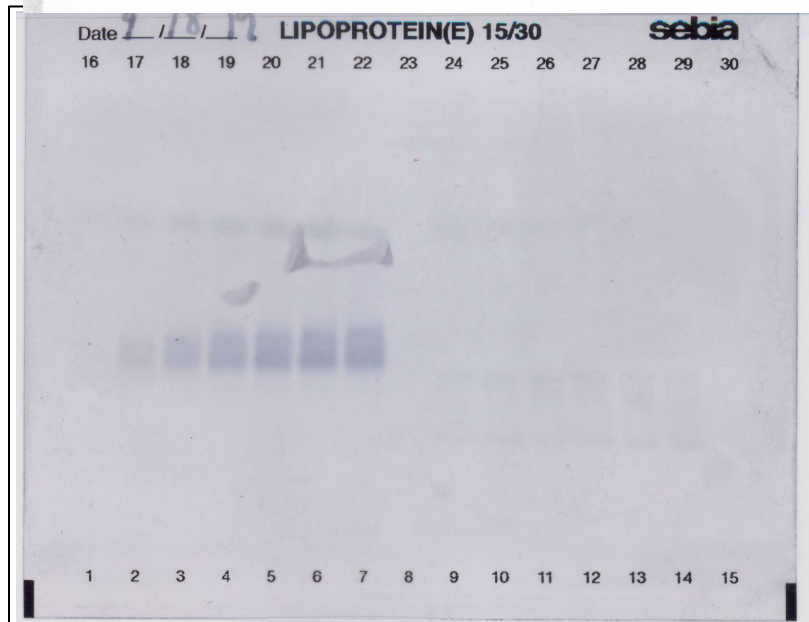

**1 2 3 4 5 6 7 8 9 10 11 12 13**

## Figure S1A (Cont.)

Lane 1: Fatty acid free BSA/BODIPY-cholesterol alone.

Lanes 2-6: Fresh human cholestatic plasma (10, 20, 30, 40, 50  $\mu$ L plasma) labeled with 100  $\mu$ L fatty acid free BSA/BODIPY-cholesterol.

Lane 7: Fresh unlabeled human cholestatic plasma (50  $\mu$ L).

Lane 8: Fatty acid free BSA/BODIPY-cholesterol alone.

Lanes 9-13: Fresh synthetic LpX (10, 20, 30, 40, 50  $\mu$ L LpX) labeled with 100  $\mu$ L fatty acid free BSA/BODIPY-cholesterol.

# Figure S1B

## BODIPY-Cholesterol Fluorescence

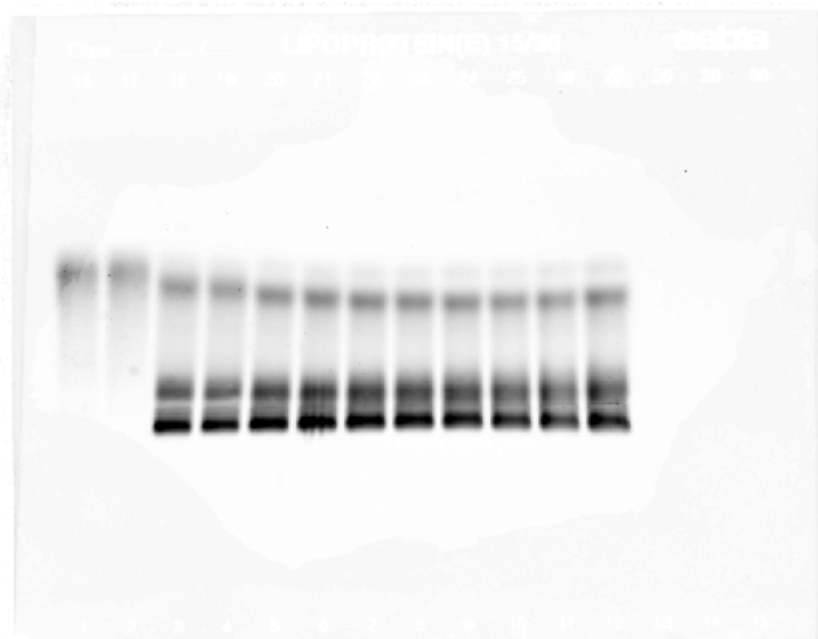

**1 2 3 4 5 6 7 8 9 10 11 12**

Lanes 1,2: Fatty acid free BSA/BODIPY-cholesterol alone.  
Lanes 3,4: Fresh human cholestatic plasma (0.1  $\mu$ L plasma) labeled with 100  $\mu$ L fatty acid free BSA/BODIPY-cholesterol.  
Lane 5,6: Fresh human cholestatic plasma (1  $\mu$ L plasma) labeled with 100  $\mu$ L fatty acid free BSA/BODIPY-cholesterol.  
Lane 7,8: Fresh human cholestatic plasma (3  $\mu$ L plasma) labeled with 100  $\mu$ L fatty acid free BSA/BODIPY-cholesterol.  
Lanes 9,10: Fresh human cholestatic plasma (10  $\mu$ L plasma) labeled with 100  $\mu$ L fatty acid free BSA/BODIPY-cholesterol.  
Lanes 11,12: Fresh human cholestatic plasma (30  $\mu$ L plasma) labeled with 100  $\mu$ L fatty acid free BSA/BODIPY-cholesterol.

# Figure S2

## BODIPY-Cholesterol Fluorescence

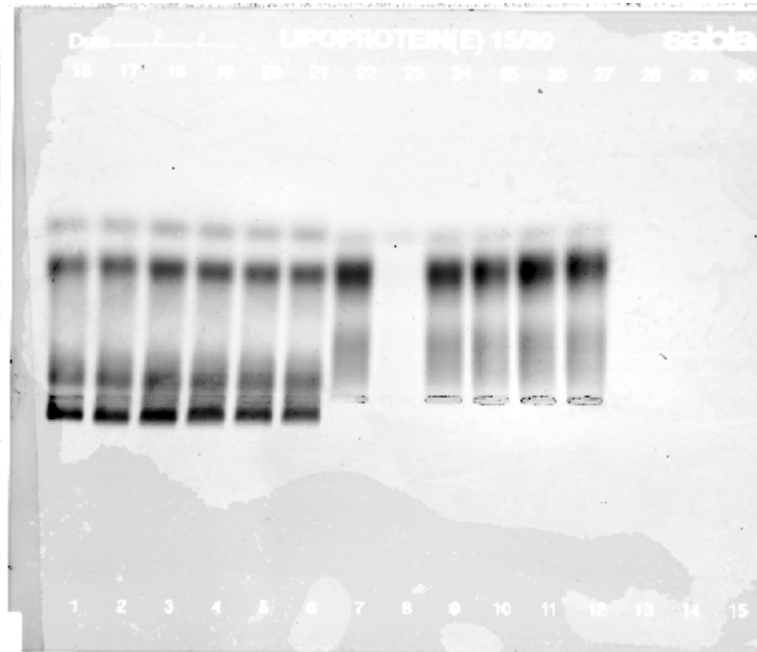

**1 2 3 4 5 6 7 8 9 10 11 12**

Lanes 1-3: Fresh human cholestatic plasma (25  $\mu$ L) labeled with 100  $\mu$ L fatty acid free BSA/BODIPY-cholesterol.

Lanes 4-6: Fresh human cholestatic plasma (25  $\mu$ L) labeled with 100  $\mu$ L fatty acid free BSA/BODIPY-cholesterol in the presence of 25 mM trehalose.

Lane 7: Fresh pooled human plasma (25  $\mu$ L) labeled with 100  $\mu$ L fatty acid free BSA/BODIPY-cholesterol.

Lane 8: Unlabeled fresh pooled normal human plasma (25  $\mu$ L).

Lane 9: Fresh pooled normal human plasma (25  $\mu$ L) labeled with 100  $\mu$ L fatty acid free BSA/BODIPY-cholesterol.

Lanes 10-12: Fresh pooled normal human plasma (25  $\mu$ L) labeled with 100  $\mu$ L fatty acid free BSA/BODIPY-cholesterol in the presence of 25 mM trehalose.

# Figure S2 (Cont.)

## Sudan Black Staining

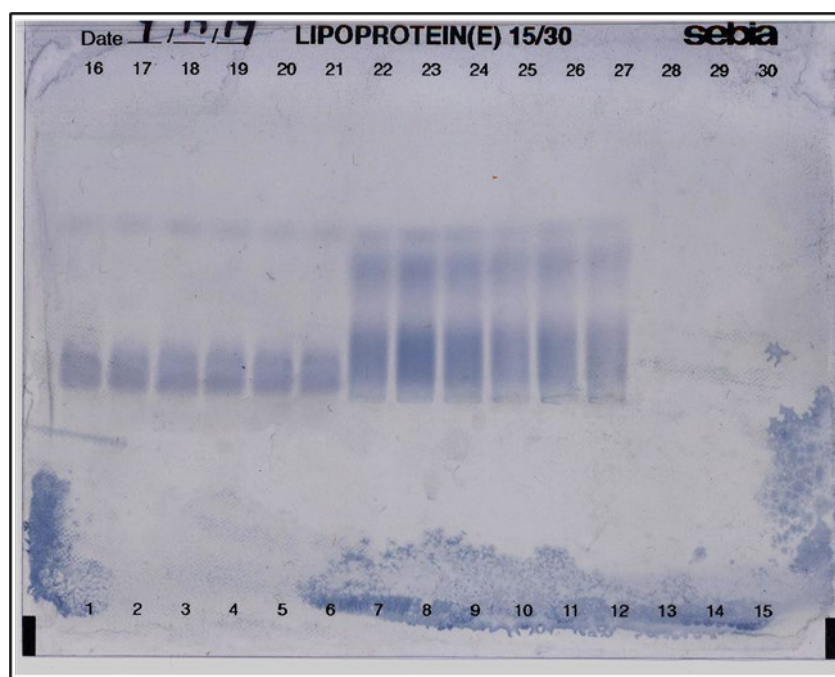

**1 2 3 4 5 6 7 8 9 10 11 12**

Lanes 1-3: Fresh human cholestatic plasma (25  $\mu$ L) labeled with 100  $\mu$ L fatty acid free BSA/BODIPY-cholesterol.

Lanes 4-6: Fresh human cholestatic plasma (25  $\mu$ L) labeled with 100  $\mu$ L fatty acid free BSA/BODIPY-cholesterol in the presence of 25 mM trehalose.

Lane 7: Fresh pooled normal human plasma (25  $\mu$ L) labeled with 100  $\mu$ L fatty acid free BSA/BODIPY-cholesterol.

Lane 8: Unlabeled fresh pooled normal human plasma (25  $\mu$ L).

Lane 9: Fresh pooled normal human plasma (25  $\mu$ L) labeled with 100  $\mu$ L fatty acid free BSA/BODIPY-cholesterol.

Lanes 10-12: Fresh pooled normal human plasma (25  $\mu$ L) labeled with 100  $\mu$ L fatty acid free BSA/BODIPY-cholesterol in the presence of 25 mM trehalose.

# Figure S3

## Filipin Fluorescence

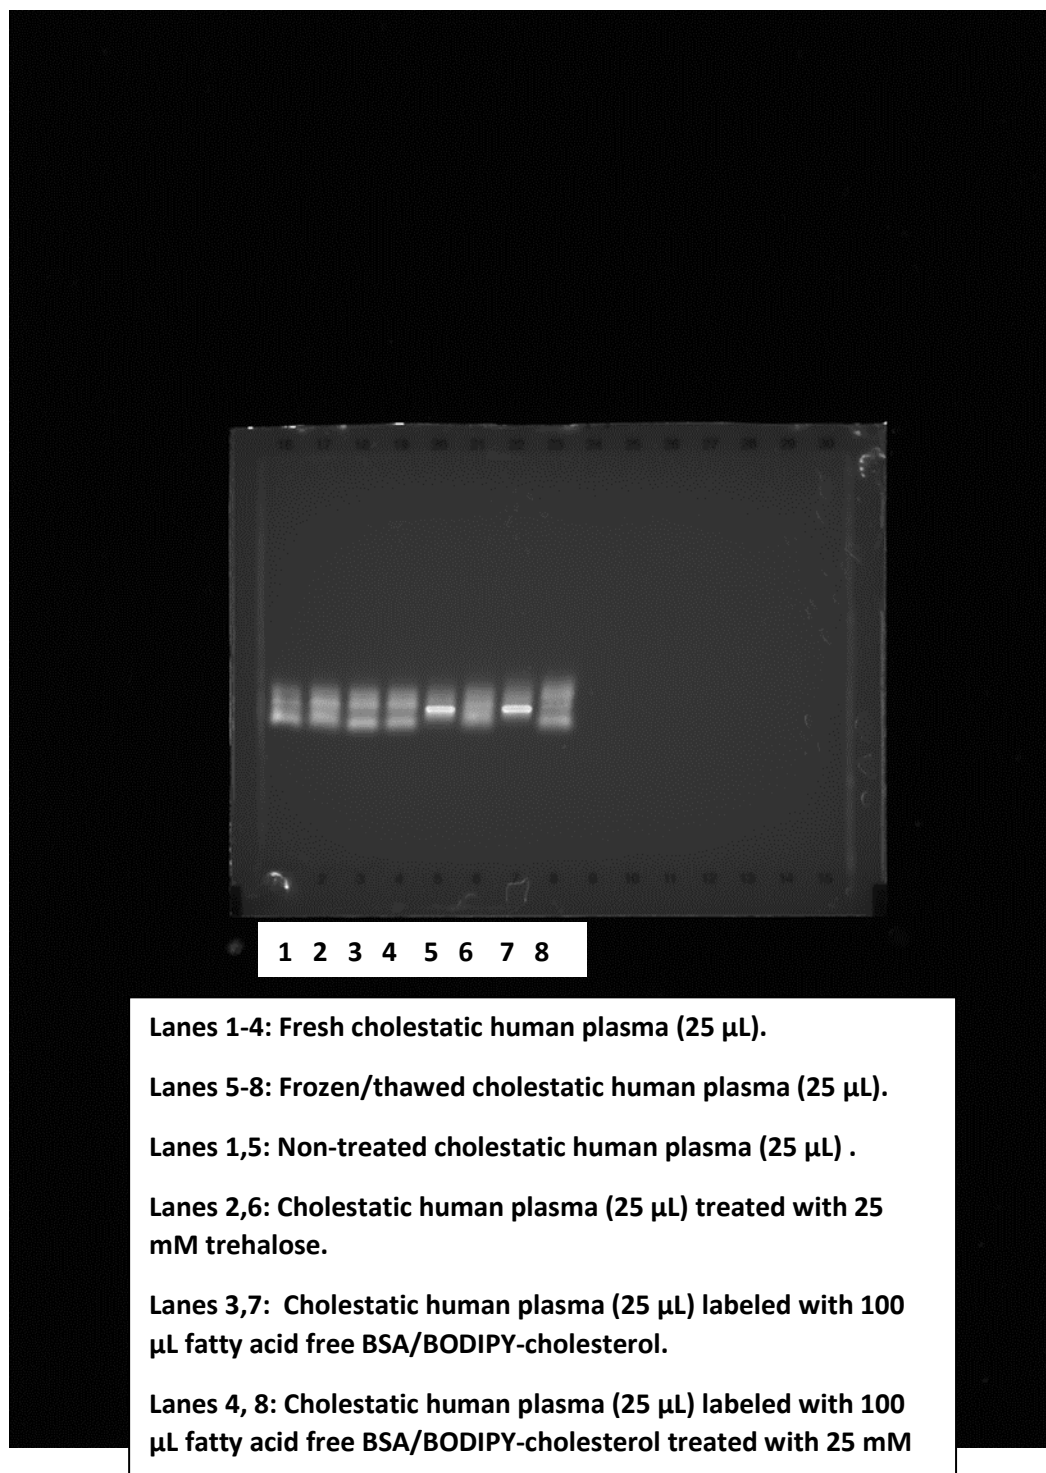

## Figure S3 (Cont.)

### BODIPY-Cholesterol Fluorescence

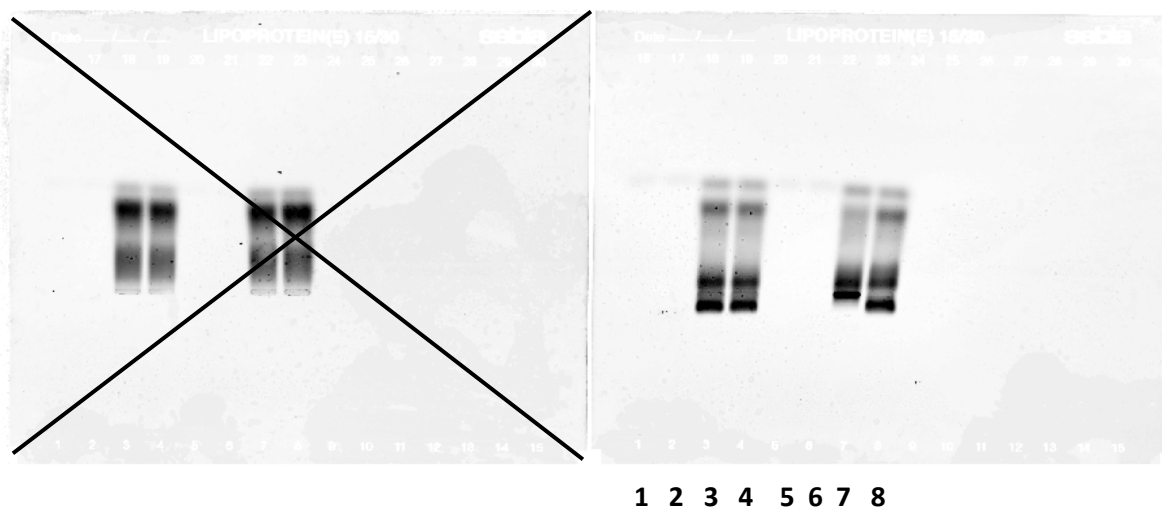

this gel was not used in manuscript

Lanes 1-4: Fresh cholestatic human plasma (25  $\mu$ L).

Lanes 5-8: Frozen/thawed cholestatic human plasma (25  $\mu$ L).

Lanes 1,5: Non-treated cholestatic human plasma (25  $\mu$ L).

Lanes 2,6: Cholestatic human plasma (25  $\mu$ L) treated with 25 mM trehalose.

Lanes 3,7: Cholestatic human plasma labeled (25  $\mu$ L) with 100  $\mu$ L fatty acid-free BSA/BODIPY-cholesterol.

Lanes 4, 8: : Cholestatic human plasma labeled (25  $\mu$ L) with 100  $\mu$ L fatty acid-free



## Figure S4

**Merged BODIPY-cholesterol (green) and Lissaminerhodamine-phosphatidylethanolamine (red) fluorescence**

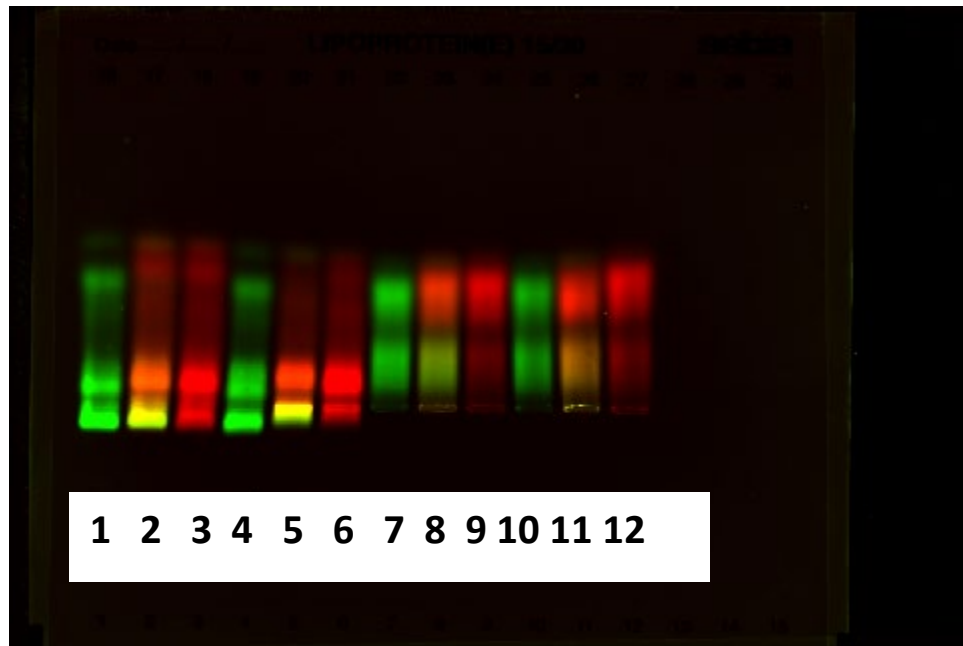

**Lanes 1-3: Fresh cholestatic human plasma (25  $\mu$ L) treated with 25 mM trehalose.**

**Lanes 4-6: Frozen/thawed cholestatic human plasma (25  $\mu$ L) treated with 25 mM trehalose.**

**Lanes 7-9: Fresh pooled normal human plasma (25  $\mu$ L) treated with 25 mM trehalose.**

**Lanes 10-12: Frozen/thawed pooled normal human plasma (25  $\mu$ L) treated with 25 mM trehalose.**

**Lanes 1,4,7,10: Plasma labeled (25  $\mu$ L) with 100  $\mu$ L fatty acid free BSA/BODIPY-cholesterol.**

**Lanes 3,6,9,12: Plasma labeled (25  $\mu$ L) with 100  $\mu$ L fatty acid free BSA/Lissaminerhodamine-phosphatidylethanolamine.**

**Lanes 2,5,8,11: Plasma labeled (25  $\mu$ L) with 100  $\mu$ L fatty acid free BSA/BODIPY-cholesterol/Lissaminerhodamine-phosphatidylethanolamine.**

## Figure S4 (Cont.)

### BODIPY-Cholesterol Fluorescence

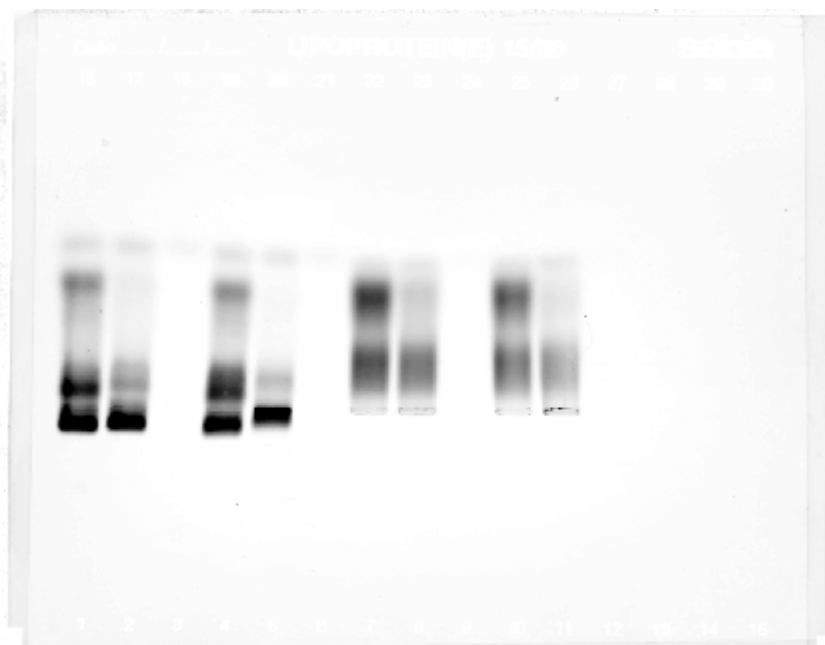

**1 2 3 4 5 6 7 8 9 10 11 12**

Lanes 1-3: Fresh cholestatic human plasma (25  $\mu$ L) treated with 25 mM trehalose.

Lanes 4-6: Frozen/thawed cholestatic human plasma (25  $\mu$ L) treated with 25 mM trehalose.

Lanes 7-9: Fresh pooled normal human plasma (25  $\mu$ L) treated with 25 mM trehalose.

Lanes 10-12: Frozen/thawed pooled normal human plasma (25  $\mu$ L) treated with 25 mM trehalose.

Lanes 1,4,7,10: Plasma labeled (25  $\mu$ L) with 100  $\mu$ L fatty acid free BSA/BODIPY-cholesterol.

Lanes 3,6,9,12: Plasma labeled (25  $\mu$ L) with 100  $\mu$ L fatty acid free BSA/Lissaminerhodamine-phosphatidylethanolamine.

Lanes 2,5,8,11: Plasma labeled (25  $\mu$ L) with 100  $\mu$ L fatty acid free BSA/BODIPY-cholesterol/Lissaminerhodamine-phosphatidylethanolamine.

## Figure S4 (Cont.)

### Lissaminerhodamine- phosphatidylethanolamine fluorescence

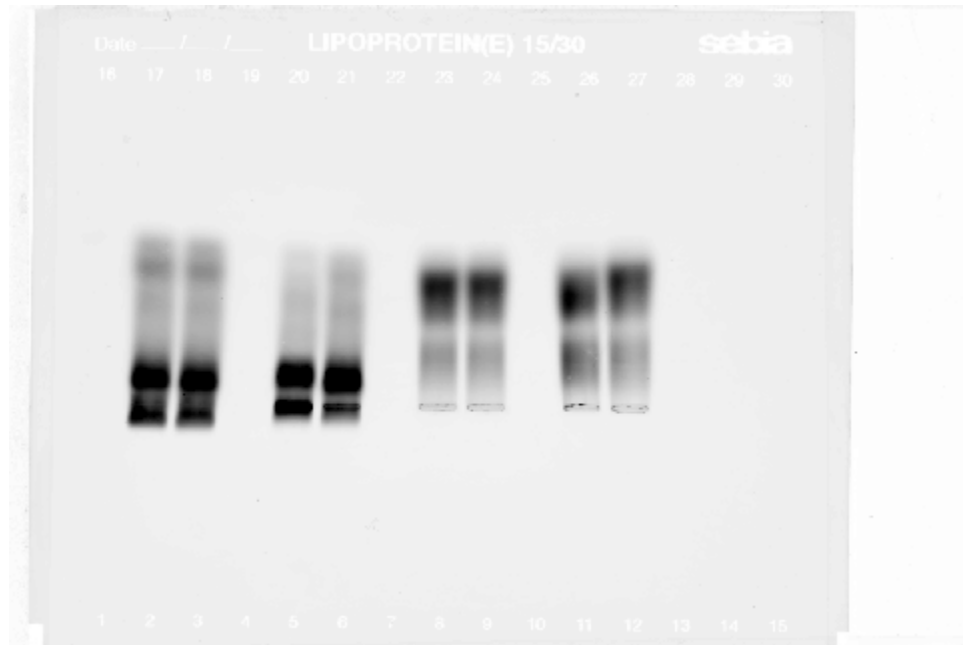

**1 2 3 4 5 6 7 8 9 10 11 12**

**Lanes 1-3: Fresh cholestatic human plasma (25  $\mu$ L) treated with 25 mM trehalose.**

**Lanes 4-6: Frozen/thawed cholestatic human plasma (25  $\mu$ L) treated with 25 mM trehalose.**

**Lanes 7-9: Fresh pooled normal human plasma (25  $\mu$ L) treated with 25 mM trehalose.**

**Lanes 10-12: Frozen/thawed pooled normal human plasma (25  $\mu$ L) treated with 25 mM trehalose.**

**Lanes 1,4,7,10: Plasma labeled (25  $\mu$ L) with 100  $\mu$ L fatty acid free BSA/BODIPY-cholesterol.**

**Lanes 3,6,9,12: Plasma labeled (25  $\mu$ L) with 100  $\mu$ L fatty acid free BSA/Lissaminerhodamine-phosphatidylethanolamine.**

**Lanes 2,5,8,11: Plasma labeled (25  $\mu$ L) with 100  $\mu$ L fatty acid free BSA/BODIPY-cholesterol/Lissaminerhodamine-phosphatidylethanolamine.**

# Figure S4 (Cont.)

## Sudan Black Staining

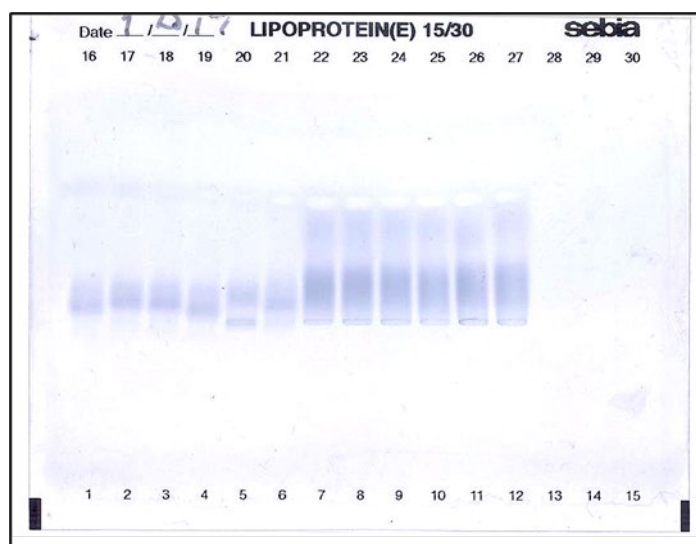

**1 2 3 4 5 6 7 8 9 10 11 12**

**Lanes 1-3: Fresh cholestatic human plasma (25  $\mu$ L) treated with 25 mM trehalose.**

**Lanes 4-6: Frozen/thawed cholestatic human plasma (25  $\mu$ L) treated with 25 mM trehalose.**

**Lanes 7-9: Fresh pooled normal human plasma (25  $\mu$ L) treated with 25 mM trehalose.**

**Lanes 10-12: Frozen/thawed pooled normal human plasma (25  $\mu$ L) treated with 25 mM trehalose.**

**Lanes 1,4,7,10: Plasma labeled (25  $\mu$ L) with 100  $\mu$ L fatty acid free BSA/BODIPY-cholesterol.**

**Lanes 3,6,9,12: Plasma labeled (25  $\mu$ L) with 100  $\mu$ L fatty acid free BSA/Lissaminerhodamine-phosphatidylethanolamine.**

**Lanes 2,5,8,11: Plasma labeled (25  $\mu$ L) with 100  $\mu$ L fatty acid free BSA/BODIPY-cholesterol/Lissaminerhodamine-phosphatidylethanolamine.**

# Figure S5A

## Filipin Fluorescence

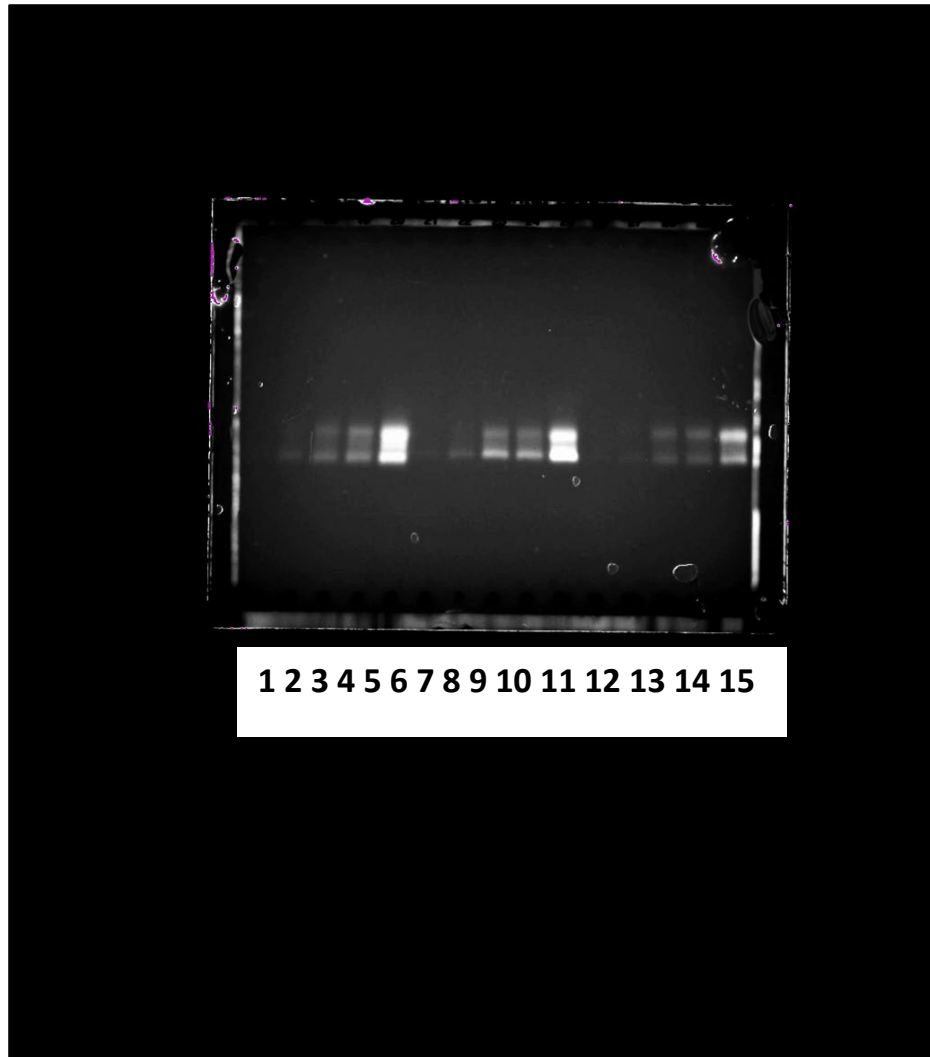

Lanes 1-5: Fresh human FLD plasma from patient #1 (0.1, 0.3, 1,3, or 10  $\mu$ L) was incubated with BODIPY-cholesterol complexed to fatty acid-free BSA (100  $\mu$ L) in the presence of 25 mM trehalose.

Lanes 6-10: Fresh human FLD plasma from patient #2 (0.1, 0.3, 1,3, or 10  $\mu$ L) was incubated with BODIPY-cholesterol complexed to fatty acid-free BSA (100  $\mu$ L) in the presence of 25 mM trehalose.

Lanes 11-15: Fresh human FLD plasma from patient #3 (0.1, 0.3, 1,3, or 10  $\mu$ L) was incubated with BODIPY-cholesterol complexed to fatty acid-free BSA (100  $\mu$ L) in the presence of 25 mM trehalose.

## Figure S5A (Cont.)

### BODIPY-Cholesterol Fluorescence

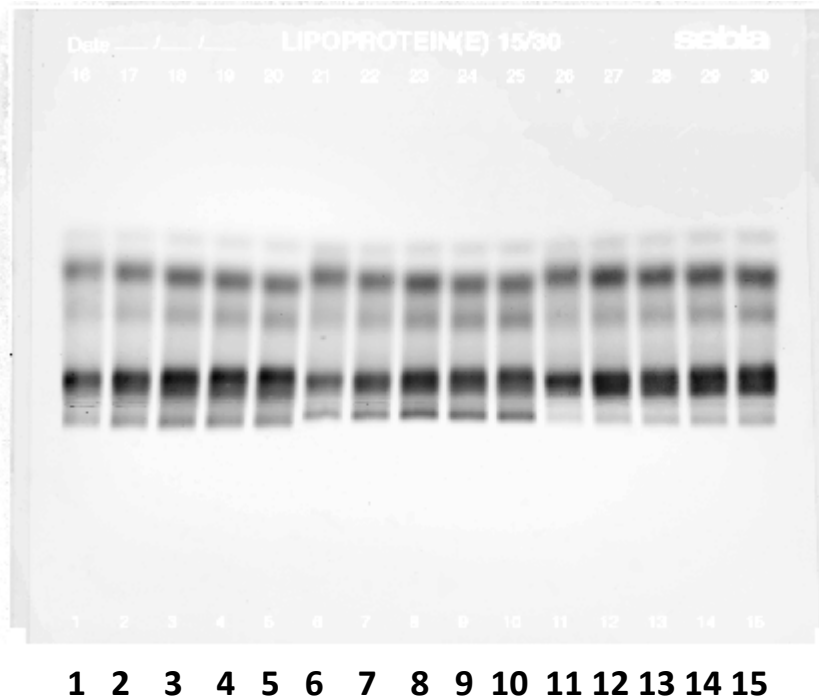

Lanes 1-5: Fresh human FLD plasma from patient #1 (0.1, 0.3, 1,3, or 10  $\mu$ L) incubated with BODIPY-cholesterol complexed to fatty acid-free BSA (100  $\mu$ L) in the presence of 25 mM trehalose.

Lanes 6-10: Fresh human FLD plasma from patient #2 (0.1, 0.3, 1,3, or 10  $\mu$ L) incubated with BODIPY-cholesterol complexed to fatty acid-free BSA (100  $\mu$ L) in the presence of 25 mM trehalose.

Lanes 11-15: Fresh human FLD plasma from patient #3 (0.1, 0.3, 1,3, or 10  $\mu$ L) incubated with BODIPY-cholesterol complexed to fatty acid-free BSA (100  $\mu$ L) in the presence of 25 mM trehalose.

# Figure S5B

## Filipin Fluorescence

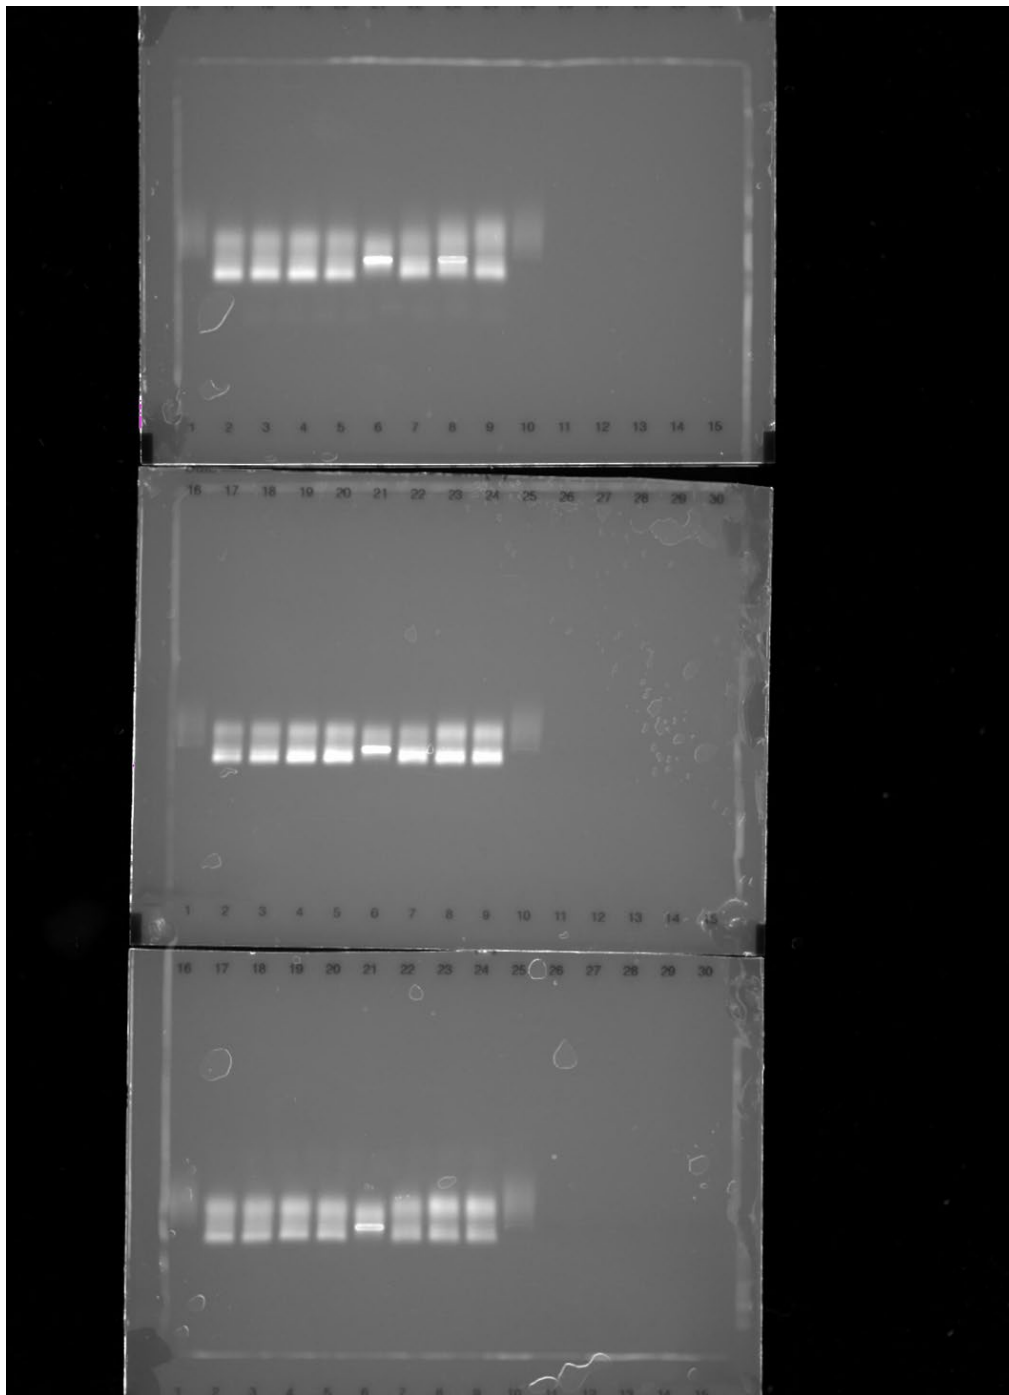

1 2 3 4 5 6 7 8 9 10

# Figure S5B

(Cont.)

## Filipin Fluorescence

### TOP GEL:

Lane 1: Fresh normal human plasma (25  $\mu$ L) incubated with BODIPY-cholesterol complexed to fatty acid-free BSA (100  $\mu$ L) in the presence of 25 mM trehalose.

Lane 2: Fresh human FLD plasma from patient #1 (25  $\mu$ L) incubated with saline only.

Lane 3: Fresh human FLD plasma from patient #1 (25  $\mu$ L) incubated with 25 mM trehalose.

Lane 4: Fresh human FLD plasma from patient #1 (25  $\mu$ L) incubated with BODIPY-cholesterol complexed to fatty acid-free BSA (100  $\mu$ L).

Lane 5: Fresh human FLD plasma from patient #1 (25  $\mu$ L) incubated with BODIPY-cholesterol complexed to fatty acid-free BSA (100  $\mu$ L) in the presence of 25 mM trehalose.

Lane 6: Frozen/thawed human FLD plasma from patient #1 (25  $\mu$ L) incubated with saline only.

Lane 7: Frozen/thawed human FLD plasma from patient #1 (25  $\mu$ L) incubated with 25 mM trehalose.

Lane 8: Frozen/thawed human FLD plasma from patient #1 (25  $\mu$ L) incubated with BODIPY-cholesterol complexed to fatty acid-free BSA (100  $\mu$ L).

Lane 9: Frozen/thawed FLD plasma from patient #1 (25  $\mu$ L) incubated with BODIPY-cholesterol complexed to fatty acid-free BSA (100  $\mu$ L) in the presence of 25 mM trehalose.

Lane 10: Frozen/thawed normal human plasma (25  $\mu$ L) incubated with BODIPY-cholesterol complexed to fatty acid-free BSA (100  $\mu$ L) in the presence of 25 mM trehalose.

### MIDDLE GEL:

Lane 1: Fresh normal human plasma (25  $\mu$ L) incubated with BODIPY-cholesterol complexed to fatty acid-free BSA (100  $\mu$ L) in the presence of 25 mM trehalose.

Lane 2: Fresh human FLD plasma from patient #2 (25  $\mu$ L) incubated with saline only.

Lane 3: Fresh human FLD plasma from patient #2 (25  $\mu$ L) incubated with 25 mM trehalose.

Lane 4: Fresh human FLD plasma from patient #2 (25  $\mu$ L) incubated with BODIPY-cholesterol complexed to fatty acid-free BSA (100  $\mu$ L).

Lane 5: Fresh human FLD plasma from patient #2 (25  $\mu$ L) incubated with BODIPY-cholesterol complexed to fatty acid-free BSA (100  $\mu$ L) in the presence of 25 mM trehalose.

Lane 6: Frozen/thawed human FLD plasma from patient #2 (25  $\mu$ L) incubated with saline only.

Lane 7: Frozen/thawed human FLD plasma from patient #2 (25  $\mu$ L) incubated with 25 mM trehalose.

Lane 8: Frozen/thawed human FLD plasma from patient #2 (25  $\mu$ L) incubated with BODIPY-cholesterol complexed to fatty acid-free BSA (100  $\mu$ L).

Lane 9: Frozen/thawed FLD plasma from patient #2 (25  $\mu$ L) incubated with BODIPY-cholesterol complexed to fatty acid-free BSA (100  $\mu$ L) in the presence of 25 mM trehalose.

Lane 10: Frozen/thawed normal human plasma (25  $\mu$ L) incubated with BODIPY-cholesterol complexed to fatty acid-free BSA (100  $\mu$ L) in the presence of 25 mM trehalose.

### BOTTOM GEL:

Lane 1: Fresh normal human plasma (25  $\mu$ L) incubated with BODIPY-cholesterol complexed to fatty acid-free BSA (100  $\mu$ L) in the presence of 25 mM trehalose.

Lane 2: Fresh human FLD plasma from patient #3 (25  $\mu$ L) incubated with saline only.

Lane 3: Fresh human FLD plasma from patient #3 (25  $\mu$ L) incubated with 25 mM trehalose.

Lane 4: Fresh human FLD plasma from patient #3 (25  $\mu$ L) incubated with BODIPY-cholesterol complexed to fatty acid-free BSA (100  $\mu$ L).

Lane 5: Fresh human FLD plasma from patient #3 (25  $\mu$ L) incubated with BODIPY-cholesterol complexed to fatty acid-free BSA (100  $\mu$ L) in the presence of 25 mM trehalose.

Lane 6: Frozen/thawed human FLD plasma from patient #3 (25  $\mu$ L) incubated with saline only.

Lane 7: Frozen/thawed human FLD plasma from patient #3 (25  $\mu$ L) incubated with 25 mM trehalose.

Lane 8: Frozen/thawed human FLD plasma from patient #3 (25  $\mu$ L) incubated with BODIPY-cholesterol complexed to fatty acid-free BSA (100  $\mu$ L).

Lane 9: Frozen/thawed FLD plasma from patient #3 (25  $\mu$ L) incubated with BODIPY-cholesterol complexed to fatty acid-free BSA (100  $\mu$ L) in the presence of 25 mM trehalose.

Lane 10: Frozen/thawed normal human plasma (25  $\mu$ L) incubated with BODIPY-cholesterol complexed to fatty acid-free BSA (100  $\mu$ L) in the presence of 25 mM trehalose.



**Figure S5B**

**Cont**

# **BODIPY-Cholesterol Fluorescence**

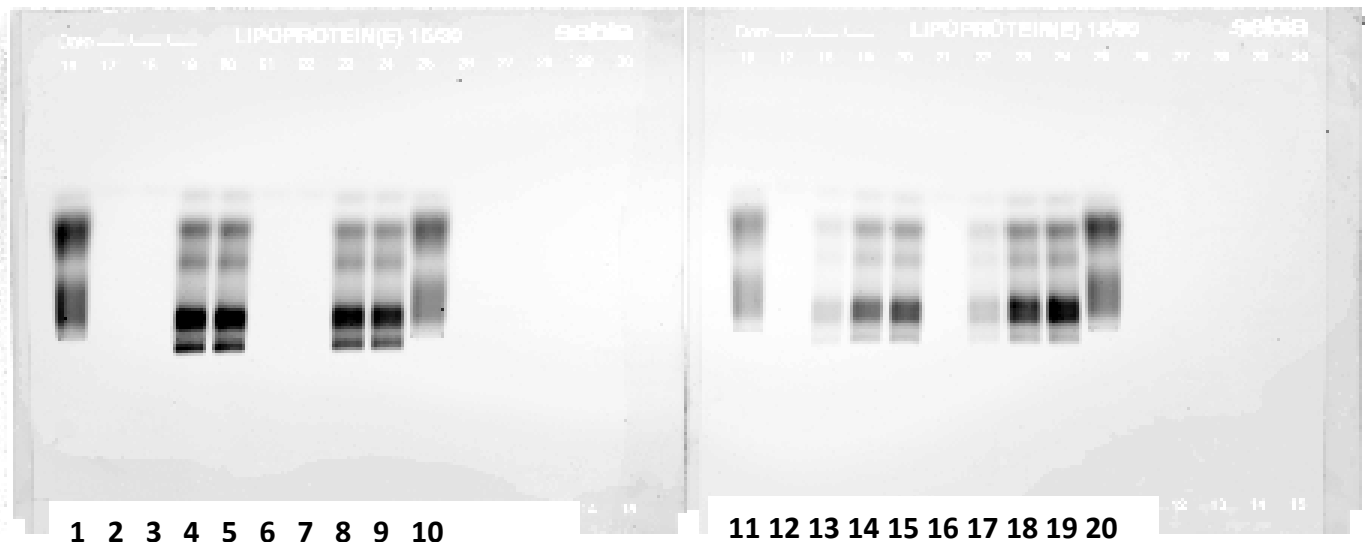

THE SAME IMAGING PARAMETERS WERE USED FOR ALL BODIPY-CHOLESTEROL FLUORESCENCE SCANS IN FIGURE 5B

- Lane 1: Fresh normal human plasma (25  $\mu$ L) incubated with BODIPY-cholesterol complexed to fatty acid-free BSA (100  $\mu$ L) in the presence of 25 mM trehalose.
- Lane 2: Fresh human FLD plasma from patient #1 (25  $\mu$ L) incubated with saline only.
- Lane 3: Fresh human FLD plasma from patient #1 (25  $\mu$ L) incubated with 25 mM trehalose.
- Lane 4: Fresh human FLD plasma from patient #1 (25  $\mu$ L) incubated with BODIPY-cholesterol complexed to fatty acid-free BSA (100  $\mu$ L).
- Lane 5: Fresh human FLD plasma from patient #1 (25  $\mu$ L) incubated with BODIPY-cholesterol complexed to fatty acid-free BSA (100  $\mu$ L) in the presence of 25 mM trehalose.
- Lane 6: Frozen/thawed human FLD plasma from patient #1 (25  $\mu$ L) incubated with saline only.
- Lane 7: Frozen/thawed human FLD plasma from patient #1 (25  $\mu$ L) incubated with 25 mM trehalose.
- Lane 8: Frozen/thawed human FLD plasma from patient #1 (25  $\mu$ L) incubated with BODIPY-cholesterol complexed to fatty acid-free BSA (100  $\mu$ L).
- Lane 9: Frozen/thawed FLD plasma from patient #1 (25  $\mu$ L) incubated with BODIPY-cholesterol complexed to fatty acid-free BSA (100  $\mu$ L) in the presence of 25 mM trehalose.
- Lane 10: Frozen/thawed normal human plasma (25  $\mu$ L) incubated with BODIPY-cholesterol complexed to fatty acid-free BSA (100  $\mu$ L) in the presence of 25 mM trehalose.
- Lane 11: Fresh normal human plasma (25  $\mu$ L) incubated with BODIPY-cholesterol complexed to fatty acid-free BSA (100  $\mu$ L) in the presence of 25 mM trehalose.
- Lane 12: Fresh human FLD plasma from patient #2 (25  $\mu$ L) incubated with saline only.
- Lane 13: Fresh human FLD plasma from patient #2 (25  $\mu$ L) incubated with 25 mM trehalose.
- Lane 14: Fresh human FLD plasma from patient #2 (25  $\mu$ L) incubated with BODIPY-cholesterol complexed to fatty acid-free BSA (100  $\mu$ L).
- Lane 15: Fresh human FLD plasma from patient #2 (25  $\mu$ L) incubated with BODIPY-cholesterol complexed to fatty acid-free BSA (100  $\mu$ L) in the presence of 25 mM trehalose.
- Lane 16: Frozen/thawed human FLD plasma from patient #2 (25  $\mu$ L) incubated with saline only.
- Lane 17: Frozen/thawed human FLD plasma from patient #2 (25  $\mu$ L) incubated with 25 mM trehalose.
- Lane 18: Frozen/thawed human FLD plasma from patient #2 (25  $\mu$ L) incubated with BODIPY-cholesterol complexed to fatty acid-free BSA (100  $\mu$ L).
- Lane 19: Frozen/thawed FLD plasma from patient #2 (25  $\mu$ L) incubated with BODIPY-cholesterol complexed to fatty acid-free BSA (100  $\mu$ L) in the presence of 25 mM trehalose.
- Lane 20: Frozen/thawed normal human plasma (25  $\mu$ L) incubated with BODIPY-cholesterol complexed to fatty acid-free BSA (100  $\mu$ L) in the presence of 25 mM trehalose.

## Figure S5B (Cont.)

### BODIPY-Cholesterol Fluorescence

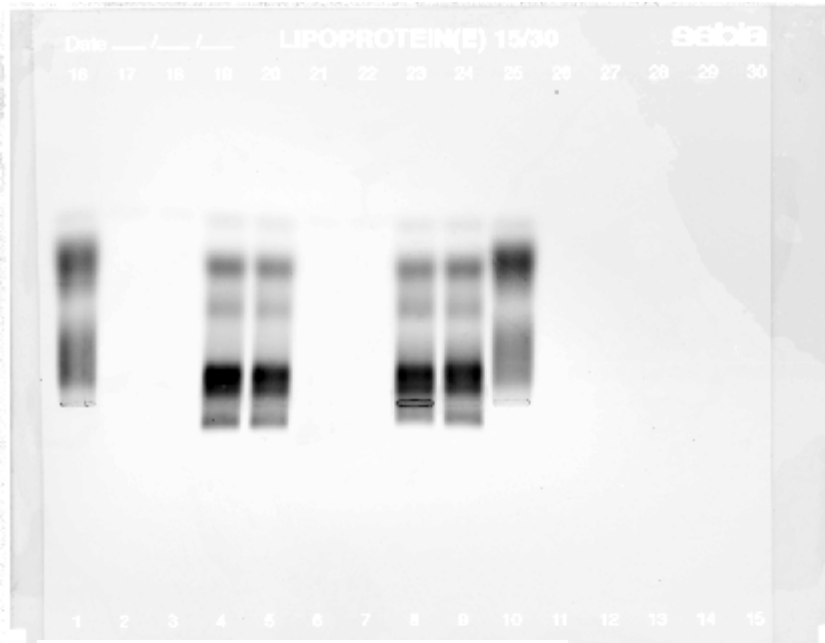

**1 2 3 4 5 6 7 8 9 10**

Lane 1: Fresh normal human plasma (25  $\mu$ L) incubated with BODIPY-cholesterol complexed to fatty acid-free BSA (100  $\mu$ L) in the presence of 25 mM trehalose.

Lane 2: Fresh human FLD plasma from patient #3 (25  $\mu$ L) incubated with saline only.

Lane 3: Fresh human FLD plasma from patient #3 (25  $\mu$ L) incubated with 25 mM trehalose.

Lane 4: Fresh human FLD plasma from patient #3 (25  $\mu$ L) incubated with BODIPY-cholesterol complexed to fatty acid-free BSA (100  $\mu$ L).

Lane 5: Fresh human FLD plasma from patient #3 (25  $\mu$ L) incubated with BODIPY-cholesterol complexed to fatty acid-free BSA (100  $\mu$ L) in the presence of 25 mM trehalose.

Lane 6: Frozen/thawed human FLD plasma from patient #3 (25  $\mu$ L) incubated with saline only.

Lane 7: Frozen/thawed human FLD plasma from patient #3 (25  $\mu$ L) incubated with 25 mM trehalose.

Lane 8: Frozen/thawed human FLD plasma from patient #3 (25  $\mu$ L) incubated with BODIPY-cholesterol complexed to fatty acid-free BSA (100  $\mu$ L).

Lane 9: Frozen/thawed FLD plasma from patient #3 (25  $\mu$ L) incubated with BODIPY-cholesterol complexed to fatty acid-free BSA (100  $\mu$ L) in the presence of 25 mM trehalose.

Lane 10: Frozen/thawed normal human plasma (25  $\mu$ L) incubated with BODIPY-cholesterol complexed to fatty acid-free BSA (100  $\mu$ L) in the presence of 25 mM trehalose.
